# Supplementary material for: Functional analysis of ZmG6PE reveals its role in responses to low-phosphorus stress and regulation of grain yield in maize
Source: Front Plant Sci. 2023 Nov 9;14:1286699. doi: 10.3389/fpls.2023.1286699 (PMC10666784; doi:10.3389/fpls.2023.1286699)
Supplement: Supplementary file 3 [file Table_2.xlsx]

## Sheet: KEGG
ID	Description	MetaboRatio	BgRatio	pvalue	p.adjust	qvalue	KEGGID	Count	KEGGID(LOG2FC)	RichFactor	URL	SecondClass	TopClass
zma00240	Pyrimidine metabolism	6/35	65/4850	5.48866e-06	0.000263456	0.000179104	C02376/C00099/C00475/C00055/C00214/C00178	6	C02376/C00099/C00475/C00055/C00214/C00178	12.79	https://www.kegg.jp/kegg-bin/show_pathway?map=zma00240&multi_query=cpd:C02376+purple%0d%0acpd:C00099+purple%0d%0acpd:C00475+purple%0d%0acpd:C00055+purple%0d%0acpd:C00214+purple%0d%0acpd:C00178+purple	Nucleotide metabolism	Metabolism
zma00520	Amino sugar and nucleotide sugar metabolism	5/35	118/4850	0.00141757	0.0236777	0.0160967	C00103/C00275/C00167/C00043/C00190	5	C00103/C00275/C00167/C00043/C00190	5.87	https://www.kegg.jp/kegg-bin/show_pathway?map=zma00520&multi_query=cpd:C00103+purple%0d%0acpd:C00275+purple%0d%0acpd:C00167+purple%0d%0acpd:C00043+purple%0d%0acpd:C00190+purple	Carbohydrate metabolism	Metabolism
zma00410	beta-Alanine metabolism	3/35	32/4850	0.00147986	0.0236777	0.0160967	C00099/C00386/C00334	3	C00099/C00386/C00334	12.99	https://www.kegg.jp/kegg-bin/show_pathway?map=zma00410&multi_query=cpd:C00099+purple%0d%0acpd:C00386+purple%0d%0acpd:C00334+purple	Metabolism of other amino acids	Metabolism
zma00480	Glutathione metabolism	3/35	38/4850	0.0024435	0.0256471	0.0174356	C00006/C00127/C01879	3	C00006/C00127/C01879	10.94	https://www.kegg.jp/kegg-bin/show_pathway?map=zma00480&multi_query=cpd:C00006+purple%0d%0acpd:C00127+purple%0d%0acpd:C01879+purple	Metabolism of other amino acids	Metabolism
zma00195	Photosynthesis	2/35	11/4850	0.00267158	0.0256471	0.0174356	C00006/C00009	2	C00006/C00009	25.19	https://www.kegg.jp/kegg-bin/show_pathway?map=zma00195&multi_query=cpd:C00006+purple%0d%0acpd:C00009+purple	Energy metabolism	Metabolism
zma00230	Purine metabolism	4/35	95/4850	0.00454373	0.0363499	0.0247115	C00575/C00499/C00144/C00942	4	C00575/C00499/C00144/C00942	5.83	https://www.kegg.jp/kegg-bin/show_pathway?map=zma00230&multi_query=cpd:C00575+purple%0d%0acpd:C00499+purple%0d%0acpd:C00144+purple%0d%0acpd:C00942+purple	Nucleotide metabolism	Metabolism
zma00190	Oxidative phosphorylation	2/35	16/4850	0.00569844	0.039075	0.0265641	C00122/C00009	2	C00122/C00009	17.32	https://www.kegg.jp/kegg-bin/show_pathway?map=zma00190&multi_query=cpd:C00122+purple%0d%0acpd:C00009+purple	Energy metabolism	Metabolism
zma00760	Nicotinate and nicotinamide metabolism	3/35	55/4850	0.00698864	0.0412028	0.0280107	C00006/C00122/C00334	3	C00006/C00122/C00334	7.56	https://www.kegg.jp/kegg-bin/show_pathway?map=zma00760&multi_query=cpd:C00006+purple%0d%0acpd:C00122+purple%0d%0acpd:C00334+purple	Metabolism of cofactors and vitamins	Metabolism
zma01240	Biosynthesis of cofactors	7/35	327/4850	0.00772553	0.0412028	0.0280107	C00197/C00099/C00006/C00103/C00275/C00127/C00167	7	C00197/C00099/C00006/C00103/C00275/C00127/C00167	2.97	https://www.kegg.jp/kegg-bin/show_pathway?map=zma01240&multi_query=cpd:C00197+purple%0d%0acpd:C00099+purple%0d%0acpd:C00006+purple%0d%0acpd:C00103+purple%0d%0acpd:C00275+purple%0d%0acpd:C00127+purple%0d%0acpd:C00167+purple	Global and overview maps	Metabolism
zma01250	Biosynthesis of nucleotide sugars	5/35	200/4850	0.0134341	0.0644835	0.0438374	C00103/C00275/C00167/C00043/C00190	5	C00103/C00275/C00167/C00043/C00190	3.46	https://www.kegg.jp/kegg-bin/show_pathway?map=zma01250&multi_query=cpd:C00103+purple%0d%0acpd:C00275+purple%0d%0acpd:C00167+purple%0d%0acpd:C00043+purple%0d%0acpd:C00190+purple	Unknown	Unknown
zma00250	Alanine, aspartate and glutamate metabolism	2/35	28/4850	0.0170043	0.0742006	0.0504434	C00122/C00334	2	C00122/C00334	9.9	https://www.kegg.jp/kegg-bin/show_pathway?map=zma00250&multi_query=cpd:C00122+purple%0d%0acpd:C00334+purple	Amino acid metabolism	Metabolism
zma00010	Glycolysis / Gluconeogenesis	2/35	31/4850	0.0206378	0.0825511	0.0561203	C00197/C00103	2	C00197/C00103	8.94	https://www.kegg.jp/kegg-bin/show_pathway?map=zma00010&multi_query=cpd:C00197+purple%0d%0acpd:C00103+purple	Carbohydrate metabolism	Metabolism
zma00561	Glycerolipid metabolism	2/35	38/4850	0.0302363	0.111642	0.0758968	C00197/C00103	2	C00197/C00103	7.29	https://www.kegg.jp/kegg-bin/show_pathway?map=zma00561&multi_query=cpd:C00197+purple%0d%0acpd:C00103+purple	Lipid metabolism	Metabolism
zma00340	Histidine metabolism	2/35	47/4850	0.0446611	0.135565	0.0921606	C00386/C05570	2	C00386/C05570	5.9	https://www.kegg.jp/kegg-bin/show_pathway?map=zma00340&multi_query=cpd:C00386+purple%0d%0acpd:C05570+purple	Amino acid metabolism	Metabolism
zma00650	Butanoate metabolism	2/35	47/4850	0.0446611	0.135565	0.0921606	C00122/C00334	2	C00122/C00334	5.9	https://www.kegg.jp/kegg-bin/show_pathway?map=zma00650&multi_query=cpd:C00122+purple%0d%0acpd:C00334+purple	Carbohydrate metabolism	Metabolism
zma00260	Glycine, serine and threonine metabolism	2/35	48/4850	0.0463956	0.135565	0.0921606	C00197/C01005	2	C00197/C01005	5.77	https://www.kegg.jp/kegg-bin/show_pathway?map=zma00260&multi_query=cpd:C00197+purple%0d%0acpd:C01005+purple	Amino acid metabolism	Metabolism
zma01200	Carbon metabolism	3/35	114/4850	0.0480127	0.135565	0.0921606	C00197/C00122/C01005	3	C00197/C00122/C01005	3.65	https://www.kegg.jp/kegg-bin/show_pathway?map=zma01200&multi_query=cpd:C00197+purple%0d%0acpd:C00122+purple%0d%0acpd:C01005+purple	Global and overview maps	Metabolism
zma00053	Ascorbate and aldarate metabolism	2/35	57/4850	0.0630685	0.156076	0.106104	C00879/C00167	2	C00879/C00167	4.86	https://www.kegg.jp/kegg-bin/show_pathway?map=zma00053&multi_query=cpd:C00879+purple%0d%0acpd:C00167+purple	Carbohydrate metabolism	Metabolism
zma01230	Biosynthesis of amino acids	3/35	128/4850	0.0636911	0.156076	0.106104	C00666/C00197/C01005	3	C00666/C00197/C01005	3.25	https://www.kegg.jp/kegg-bin/show_pathway?map=zma01230&multi_query=cpd:C00666+purple%0d%0acpd:C00197+purple%0d%0acpd:C01005+purple	Global and overview maps	Metabolism
zma00040	Pentose and glucuronate interconversions	2/35	58/4850	0.0650316	0.156076	0.106104	C00103/C00167	2	C00103/C00167	4.78	https://www.kegg.jp/kegg-bin/show_pathway?map=zma00040&multi_query=cpd:C00103+purple%0d%0acpd:C00167+purple	Carbohydrate metabolism	Metabolism
zma00997	Biosynthesis of various secondary metabolites - part 3	2/35	64/4850	0.077232	0.173088	0.11767	C00197/C01005	2	C00197/C01005	4.33	https://www.kegg.jp/kegg-bin/show_pathway?map=zma00997&multi_query=cpd:C00197+purple%0d%0acpd:C01005+purple	Biosynthesis of other secondary metabolites	Metabolism
zma00270	Cysteine and methionine metabolism	2/35	65/4850	0.0793321	0.173088	0.11767	C00197/C01005	2	C00197/C01005	4.26	https://www.kegg.jp/kegg-bin/show_pathway?map=zma00270&multi_query=cpd:C00197+purple%0d%0acpd:C01005+purple	Amino acid metabolism	Metabolism
zma04075	Plant hormone signal transduction	1/35	12/4850	0.083333	0.173912	0.11823	C08491	1	C08491	11.55	https://www.kegg.jp/kegg-bin/show_pathway?map=zma04075&multi_query=cpd:C08491+purple	Signal transduction	Environmental Information Processing
zma00020	Citrate cycle (TCA cycle)	1/35	20/4850	0.135098	0.270195	0.183685	C00122	1	C00122	6.93	https://www.kegg.jp/kegg-bin/show_pathway?map=zma00020&multi_query=cpd:C00122+purple	Carbohydrate metabolism	Metabolism
zma00220	Arginine biosynthesis	1/35	23/4850	0.153768	0.283879	0.192988	C00122	1	C00122	6.02	https://www.kegg.jp/kegg-bin/show_pathway?map=zma00220&multi_query=cpd:C00122+purple	Amino acid metabolism	Metabolism
zma00710	Carbon fixation in photosynthetic organisms	1/35	23/4850	0.153768	0.283879	0.192988	C00197	1	C00197	6.02	https://www.kegg.jp/kegg-bin/show_pathway?map=zma00710&multi_query=cpd:C00197+purple	Energy metabolism	Metabolism
zma00770	Pantothenate and CoA biosynthesis	1/35	30/4850	0.195822	0.347783	0.236432	C00099	1	C00099	4.62	https://www.kegg.jp/kegg-bin/show_pathway?map=zma00770&multi_query=cpd:C00099+purple	Metabolism of cofactors and vitamins	Metabolism
zma00620	Pyruvate metabolism	1/35	32/4850	0.20746	0.347783	0.236432	C00122	1	C00122	4.33	https://www.kegg.jp/kegg-bin/show_pathway?map=zma00620&multi_query=cpd:C00122+purple	Carbohydrate metabolism	Metabolism
zma00920	Sulfur metabolism	1/35	33/4850	0.213217	0.347783	0.236432	C11143	1	C11143	4.2	https://www.kegg.jp/kegg-bin/show_pathway?map=zma00920&multi_query=cpd:C11143+purple	Energy metabolism	Metabolism
zma00030	Pentose phosphate pathway	1/35	35/4850	0.22461	0.347783	0.236432	C00197	1	C00197	3.96	https://www.kegg.jp/kegg-bin/show_pathway?map=zma00030&multi_query=cpd:C00197+purple	Carbohydrate metabolism	Metabolism
zma00300	Lysine biosynthesis	1/35	35/4850	0.22461	0.347783	0.236432	C00666	1	C00666	3.96	https://www.kegg.jp/kegg-bin/show_pathway?map=zma00300&multi_query=cpd:C00666+purple	Amino acid metabolism	Metabolism
zma00500	Starch and sucrose metabolism	1/35	37/4850	0.235843	0.353764	0.240497	C00103	1	C00103	3.75	https://www.kegg.jp/kegg-bin/show_pathway?map=zma00500&multi_query=cpd:C00103+purple	Carbohydrate metabolism	Metabolism
zma00908	Zeatin biosynthesis	1/35	39/4850	0.246917	0.356324	0.242238	C00190	1	C00190	3.55	https://www.kegg.jp/kegg-bin/show_pathway?map=zma00908&multi_query=cpd:C00190+purple	Metabolism of terpenoids and polyketides	Metabolism
zma00640	Propanoate metabolism	1/35	40/4850	0.252396	0.356324	0.242238	C00099	1	C00099	3.46	https://www.kegg.jp/kegg-bin/show_pathway?map=zma00640&multi_query=cpd:C00099+purple	Carbohydrate metabolism	Metabolism
zma02010	ABC transporters	2/35	138/4850	0.262631	0.360179	0.244859	C00475/C00009	2	C00475/C00009	2.01	https://www.kegg.jp/kegg-bin/show_pathway?map=zma02010&multi_query=cpd:C00475+purple%0d%0acpd:C00009+purple	Membrane transport	Environmental Information Processing
zma00592	alpha-Linolenic acid metabolism	1/35	44/4850	0.273926	0.365235	0.248296	C08491	1	C08491	3.15	https://www.kegg.jp/kegg-bin/show_pathway?map=zma00592&multi_query=cpd:C08491+purple	Lipid metabolism	Metabolism
zma00052	Galactose metabolism	1/35	46/4850	0.284464	0.369034	0.250879	C00103	1	C00103	3.01	https://www.kegg.jp/kegg-bin/show_pathway?map=zma00052&multi_query=cpd:C00103+purple	Carbohydrate metabolism	Metabolism
zma00944	Flavone and flavonol biosynthesis	1/35	51/4850	0.310163	0.387931	0.263725	C05625	1	C05625	2.72	https://www.kegg.jp/kegg-bin/show_pathway?map=zma00944&multi_query=cpd:C05625+purple	Biosynthesis of other secondary metabolites	Metabolism
zma00970	Aminoacyl-tRNA biosynthesis	1/35	52/4850	0.315194	0.387931	0.263725	C01005	1	C01005	2.66	https://www.kegg.jp/kegg-bin/show_pathway?map=zma00970&multi_query=cpd:C01005+purple	Translation	Genetic Information Processing
zma00051	Fructose and mannose metabolism	1/35	54/4850	0.32515	0.39018	0.265254	C00275	1	C00275	2.57	https://www.kegg.jp/kegg-bin/show_pathway?map=zma00051&multi_query=cpd:C00275+purple	Carbohydrate metabolism	Metabolism
zma00564	Glycerophospholipid metabolism	1/35	56/4850	0.334964	0.392154	0.266596	C00588	1	C00588	2.47	https://www.kegg.jp/kegg-bin/show_pathway?map=zma00564&multi_query=cpd:C00588+purple	Lipid metabolism	Metabolism
zma00360	Phenylalanine metabolism	1/35	59/4850	0.349427	0.399345	0.271485	C00122	1	C00122	2.35	https://www.kegg.jp/kegg-bin/show_pathway?map=zma00360&multi_query=cpd:C00122+purple	Amino acid metabolism	Metabolism
zma00630	Glyoxylate and dicarboxylate metabolism	1/35	62/4850	0.363584	0.405862	0.275915	C00197	1	C00197	2.24	https://www.kegg.jp/kegg-bin/show_pathway?map=zma00630&multi_query=cpd:C00197+purple	Carbohydrate metabolism	Metabolism
zma00942	Anthocyanin biosynthesis	1/35	66/4850	0.381996	0.408006	0.277373	C08725	1	C08725	2.1	https://www.kegg.jp/kegg-bin/show_pathway?map=zma00942&multi_query=cpd:C08725+purple	Biosynthesis of other secondary metabolites	Metabolism
zma00470	D-Amino acid metabolism	1/35	67/4850	0.386517	0.408006	0.277373	C00666	1	C00666	2.07	https://www.kegg.jp/kegg-bin/show_pathway?map=zma00470&multi_query=cpd:C00666+purple	Metabolism of other amino acids	Metabolism
zma00940	Phenylpropanoid biosynthesis	1/35	68/4850	0.391006	0.408006	0.277373	C00761	1	C00761	2.04	https://www.kegg.jp/kegg-bin/show_pathway?map=zma00940&multi_query=cpd:C00761+purple	Biosynthesis of other secondary metabolites	Metabolism
zma00330	Arginine and proline metabolism	1/35	72/4850	0.408646	0.417341	0.283718	C00334	1	C00334	1.92	https://www.kegg.jp/kegg-bin/show_pathway?map=zma00330&multi_query=cpd:C00334+purple	Amino acid metabolism	Metabolism
zma00350	Tyrosine metabolism	1/35	78/4850	0.434179	0.434179	0.295165	C00122	1	C00122	1.78	https://www.kegg.jp/kegg-bin/show_pathway?map=zma00350&multi_query=cpd:C00122+purple	Amino acid metabolism	Metabolism
