# Supplementary material for: Functional analysis of ZmG6PE reveals its role in responses to low-phosphorus stress and regulation of grain yield in maize
Source: Front Plant Sci. 2023 Nov 9;14:1286699. doi: 10.3389/fpls.2023.1286699 (PMC10666784; doi:10.3389/fpls.2023.1286699)
Supplement: Supplementary file 4 [file Table_3.xlsx]

## Sheet: KEGG
ID	Description	MetaboRatio	BgRatio	pvalue	p.adjust	qvalue	KEGGID	Count	KEGGID(LOG2FC)	RichFactor	URL	SecondClass	TopClass
zma00630	Glyoxylate and dicarboxylate metabolism	4/28	62/4850	0.000394018	0.00909478	0.00517484	C00417/C00158/C00258/C01732	4	C00417/C00158/C00258/C01732	11.18	https://www.kegg.jp/kegg-bin/show_pathway?map=zma00630&multi_query=cpd:C00417+purple%0d%0acpd:C00158+purple%0d%0acpd:C00258+purple%0d%0acpd:C01732+purple	Carbohydrate metabolism	Metabolism
zma00520	Amino sugar and nucleotide sugar metabolism	5/28	118/4850	0.00049161	0.00909478	0.00517484	C00103/C00275/C00167/C00043/C00190	5	C00103/C00275/C00167/C00043/C00190	7.34	https://www.kegg.jp/kegg-bin/show_pathway?map=zma00520&multi_query=cpd:C00103+purple%0d%0acpd:C00275+purple%0d%0acpd:C00167+purple%0d%0acpd:C00043+purple%0d%0acpd:C00190+purple	Carbohydrate metabolism	Metabolism
zma01200	Carbon metabolism	4/28	114/4850	0.00383436	0.0423823	0.0241151	C00158/C00257/C00258/C01732	4	C00158/C00257/C00258/C01732	6.08	https://www.kegg.jp/kegg-bin/show_pathway?map=zma01200&multi_query=cpd:C00158+purple%0d%0acpd:C00257+purple%0d%0acpd:C00258+purple%0d%0acpd:C01732+purple	Global and overview maps	Metabolism
zma01250	Biosynthesis of nucleotide sugars	5/28	200/4850	0.00513425	0.0423823	0.0241151	C00103/C00275/C00167/C00043/C00190	5	C00103/C00275/C00167/C00043/C00190	4.33	https://www.kegg.jp/kegg-bin/show_pathway?map=zma01250&multi_query=cpd:C00103+purple%0d%0acpd:C00275+purple%0d%0acpd:C00167+purple%0d%0acpd:C00043+purple%0d%0acpd:C00190+purple	Unknown	Unknown
zma00020	Citrate cycle (TCA cycle)	2/28	20/4850	0.00572734	0.0423823	0.0241151	C00417/C00158	2	C00417/C00158	17.32	https://www.kegg.jp/kegg-bin/show_pathway?map=zma00020&multi_query=cpd:C00417+purple%0d%0acpd:C00158+purple	Carbohydrate metabolism	Metabolism
zma00250	Alanine, aspartate and glutamate metabolism	2/28	28/4850	0.0110746	0.0668634	0.0380446	C00158/C00402	2	C00158/C00402	12.37	https://www.kegg.jp/kegg-bin/show_pathway?map=zma00250&multi_query=cpd:C00158+purple%0d%0acpd:C00402+purple	Amino acid metabolism	Metabolism
zma00660	C5-Branched dibasic acid metabolism	2/28	34/4850	0.0160896	0.0668634	0.0380446	C00417/C01732	2	C00417/C01732	10.19	https://www.kegg.jp/kegg-bin/show_pathway?map=zma00660&multi_query=cpd:C00417+purple%0d%0acpd:C01732+purple	Carbohydrate metabolism	Metabolism
zma00230	Purine metabolism	3/28	95/4850	0.0167343	0.0668634	0.0380446	C01367/C00499/C00144	3	C01367/C00499/C00144	5.47	https://www.kegg.jp/kegg-bin/show_pathway?map=zma00230&multi_query=cpd:C01367+purple%0d%0acpd:C00499+purple%0d%0acpd:C00144+purple	Nucleotide metabolism	Metabolism
zma00030	Pentose phosphate pathway	2/28	35/4850	0.0170043	0.0668634	0.0380446	C00257/C00258	2	C00257/C00258	9.9	https://www.kegg.jp/kegg-bin/show_pathway?map=zma00030&multi_query=cpd:C00257+purple%0d%0acpd:C00258+purple	Carbohydrate metabolism	Metabolism
zma00500	Starch and sucrose metabolism	2/28	37/4850	0.0188989	0.0668634	0.0380446	C00103/C00089	2	C00103/C00089	9.36	https://www.kegg.jp/kegg-bin/show_pathway?map=zma00500&multi_query=cpd:C00103+purple%0d%0acpd:C00089+purple	Carbohydrate metabolism	Metabolism
zma00561	Glycerolipid metabolism	2/28	38/4850	0.0198783	0.0668634	0.0380446	C00103/C00258	2	C00103/C00258	9.12	https://www.kegg.jp/kegg-bin/show_pathway?map=zma00561&multi_query=cpd:C00103+purple%0d%0acpd:C00258+purple	Lipid metabolism	Metabolism
zma00052	Galactose metabolism	2/28	46/4850	0.0284492	0.0842713	0.0479495	C00103/C00089	2	C00103/C00089	7.53	https://www.kegg.jp/kegg-bin/show_pathway?map=zma00052&multi_query=cpd:C00103+purple%0d%0acpd:C00089+purple	Carbohydrate metabolism	Metabolism
zma00650	Butanoate metabolism	2/28	47/4850	0.0296088	0.0842713	0.0479495	C00497/C01384	2	C00497/C01384	7.37	https://www.kegg.jp/kegg-bin/show_pathway?map=zma00650&multi_query=cpd:C00497+purple%0d%0acpd:C01384+purple	Carbohydrate metabolism	Metabolism
zma01240	Biosynthesis of cofactors	5/28	327/4850	0.0367764	0.0947927	0.0539361	C00099/C00158/C00103/C00275/C00167	5	C00099/C00158/C00103/C00275/C00167	2.65	https://www.kegg.jp/kegg-bin/show_pathway?map=zma01240&multi_query=cpd:C00099+purple%0d%0acpd:C00158+purple%0d%0acpd:C00103+purple%0d%0acpd:C00275+purple%0d%0acpd:C00167+purple	Global and overview maps	Metabolism
zma01210	2-Oxocarboxylic acid metabolism	3/28	134/4850	0.0408323	0.0947927	0.0539361	C00417/C00158/C08426	3	C00417/C00158/C08426	3.88	https://www.kegg.jp/kegg-bin/show_pathway?map=zma01210&multi_query=cpd:C00417+purple%0d%0acpd:C00158+purple%0d%0acpd:C08426+purple	Global and overview maps	Metabolism
zma00053	Ascorbate and aldarate metabolism	2/28	57/4850	0.0421999	0.0947927	0.0539361	C00879/C00167	2	C00879/C00167	6.08	https://www.kegg.jp/kegg-bin/show_pathway?map=zma00053&multi_query=cpd:C00879+purple%0d%0acpd:C00167+purple	Carbohydrate metabolism	Metabolism
zma00040	Pentose and glucuronate interconversions	2/28	58/4850	0.0435534	0.0947927	0.0539361	C00103/C00167	2	C00103/C00167	5.97	https://www.kegg.jp/kegg-bin/show_pathway?map=zma00040&multi_query=cpd:C00103+purple%0d%0acpd:C00167+purple	Carbohydrate metabolism	Metabolism
zma00240	Pyrimidine metabolism	2/28	65/4850	0.0534718	0.109914	0.0625401	C00099/C00055	2	C00099/C00055	5.33	https://www.kegg.jp/kegg-bin/show_pathway?map=zma00240&multi_query=cpd:C00099+purple%0d%0acpd:C00055+purple	Nucleotide metabolism	Metabolism
zma00232	Caffeine metabolism	1/28	22/4850	0.119844	0.23338	0.132791	C07480	1	C07480	7.87	https://www.kegg.jp/kegg-bin/show_pathway?map=zma00232&multi_query=cpd:C07480+purple	Biosynthesis of other secondary metabolites	Metabolism
zma00770	Pantothenate and CoA biosynthesis	1/28	30/4850	0.159889	0.285273	0.162318	C00099	1	C00099	5.77	https://www.kegg.jp/kegg-bin/show_pathway?map=zma00770&multi_query=cpd:C00099+purple	Metabolism of cofactors and vitamins	Metabolism
zma00010	Glycolysis / Gluconeogenesis	1/28	31/4850	0.164769	0.285273	0.162318	C00103	1	C00103	5.59	https://www.kegg.jp/kegg-bin/show_pathway?map=zma00010&multi_query=cpd:C00103+purple	Carbohydrate metabolism	Metabolism
zma00410	beta-Alanine metabolism	1/28	32/4850	0.169622	0.285273	0.162318	C00099	1	C00099	5.41	https://www.kegg.jp/kegg-bin/show_pathway?map=zma00410&multi_query=cpd:C00099+purple	Metabolism of other amino acids	Metabolism
zma02010	ABC transporters	2/28	138/4850	0.188684	0.303536	0.172709	C00089/C05776	2	C00089/C05776	2.51	https://www.kegg.jp/kegg-bin/show_pathway?map=zma02010&multi_query=cpd:C00089+purple%0d%0acpd:C05776+purple	Membrane transport	Environmental Information Processing
zma00908	Zeatin biosynthesis	1/28	39/4850	0.202839	0.307069	0.174719	C00190	1	C00190	4.44	https://www.kegg.jp/kegg-bin/show_pathway?map=zma00908&multi_query=cpd:C00190+purple	Metabolism of terpenoids and polyketides	Metabolism
zma00640	Propanoate metabolism	1/28	40/4850	0.207479	0.307069	0.174719	C00099	1	C00099	4.33	https://www.kegg.jp/kegg-bin/show_pathway?map=zma00640&multi_query=cpd:C00099+purple	Carbohydrate metabolism	Metabolism
zma00260	Glycine, serine and threonine metabolism	1/28	48/4850	0.243669	0.346759	0.197303	C00258	1	C00258	3.61	https://www.kegg.jp/kegg-bin/show_pathway?map=zma00260&multi_query=cpd:C00258+purple	Amino acid metabolism	Metabolism
zma00051	Fructose and mannose metabolism	1/28	54/4850	0.26976	0.355025	0.202005	C00275	1	C00275	3.21	https://www.kegg.jp/kegg-bin/show_pathway?map=zma00051&multi_query=cpd:C00275+purple	Carbohydrate metabolism	Metabolism
zma00760	Nicotinate and nicotinamide metabolism	1/28	55/4850	0.274023	0.355025	0.202005	C01384	1	C01384	3.15	https://www.kegg.jp/kegg-bin/show_pathway?map=zma00760&multi_query=cpd:C01384+purple	Metabolism of cofactors and vitamins	Metabolism
zma00564	Glycerophospholipid metabolism	1/28	56/4850	0.278263	0.355025	0.202005	C00588	1	C00588	3.09	https://www.kegg.jp/kegg-bin/show_pathway?map=zma00564&multi_query=cpd:C00588+purple	Lipid metabolism	Metabolism
zma00360	Phenylalanine metabolism	1/28	59/4850	0.290838	0.3587	0.204097	C05332	1	C05332	2.94	https://www.kegg.jp/kegg-bin/show_pathway?map=zma00360&multi_query=cpd:C05332+purple	Amino acid metabolism	Metabolism
zma00997	Biosynthesis of various secondary metabolites - part 3	1/28	64/4850	0.311328	0.371585	0.211428	C00158	1	C00158	2.71	https://www.kegg.jp/kegg-bin/show_pathway?map=zma00997&multi_query=cpd:C00158+purple	Biosynthesis of other secondary metabolites	Metabolism
zma00470	D-Amino acid metabolism	1/28	67/4850	0.323347	0.37387	0.212728	C00402	1	C00402	2.59	https://www.kegg.jp/kegg-bin/show_pathway?map=zma00470&multi_query=cpd:C00402+purple	Metabolism of other amino acids	Metabolism
zma00941	Flavonoid biosynthesis	1/28	74/4850	0.35061	0.386607	0.219976	C09789	1	C09789	2.34	https://www.kegg.jp/kegg-bin/show_pathway?map=zma00941&multi_query=cpd:C09789+purple	Biosynthesis of other secondary metabolites	Metabolism
zma00966	Glucosinolate biosynthesis	1/28	77/4850	0.361967	0.386607	0.219976	C08426	1	C08426	2.25	https://www.kegg.jp/kegg-bin/show_pathway?map=zma00966&multi_query=cpd:C08426+purple	Biosynthesis of other secondary metabolites	Metabolism
zma00350	Tyrosine metabolism	1/28	78/4850	0.36571	0.386607	0.219976	C01384	1	C01384	2.22	https://www.kegg.jp/kegg-bin/show_pathway?map=zma00350&multi_query=cpd:C01384+purple	Amino acid metabolism	Metabolism
zma00904	Diterpenoid biosynthesis	1/28	124/4850	0.516759	0.528113	0.300491	C07601	1	C07601	1.4	https://www.kegg.jp/kegg-bin/show_pathway?map=zma00904&multi_query=cpd:C07601+purple	Metabolism of terpenoids and polyketides	Metabolism
zma01230	Biosynthesis of amino acids	1/28	128/4850	0.528113	0.528113	0.300491	C00158	1	C00158	1.35	https://www.kegg.jp/kegg-bin/show_pathway?map=zma01230&multi_query=cpd:C00158+purple	Global and overview maps	Metabolism
